# Supplementary material
Source: publisher site journal article supplement (https://www.dovepress.com/article/supplementary_file/548659/Supplementary_revised.docx)
Supplement: Supplementary file 1 [file Supplementary_revised.docx]

**Table S1
List of anatomical therapeutic chemical classification system codes (ATC-codes)**

| **ATC-code** | **Type** | **Name** |
| --- | --- | --- |
| N02BE01 | Paracetamol | Paracetamol |
| M01AA01 | NSAID | Phenylbutazone |
| M01AB01 | NSAID | Indometacin |
| M01AB02 | NSAID | Sulindac |
| M01AB03 | NSAID | Tolmetin |
| M01AB05 | NSAID | Diclofenac |
| M01AB55 | NSAID | Diclofenac, combinations M01AB08 Etodolac |
| M01AB16 | NSAID | Aceclofenac |
| M01AC01 | NSAID | Piroxicam |
| M01AC02 | NSAID | Tenoxicam |
| M01AC05 | NSAID | Lornoxicam |
| M01AC06 | NSAID | Meloxicam |
| M01AE01 | NSAID | Ibuprofen |
| M01AE02 | NSAID | Naproxen |
| M01AE03 | NSAID | Ketoprofen |
| M01AE04 | NSAID | Fenoprofen |
| M01AE09 | NSAID | Flurbiprofen |
| M01AE11 | NSAID | Tiaprofenic acid |
| M01AE14 | NSAID | Dexibuprofen |
| M01AE17 | NSAID | Dexketoprofen |
| M01AE52 | NSAID | Naproxen and esomeprazole M01AG02 Tolfenamic acid |
| M01AH01 | NSAID | Celecoxib |
| M01AH02 | NSAID | Rofecoxib |
| M01AH05 | NSAID | Etoricoxib |
| N02BA01 | NSAID | Acetylsalicylic acid (Aspirin, Idotyl, Magnyl) |
| N02BA11 | NSAID | Diflunisal (Donobid) |
| N02BA5. | NSAID | Acetylsalicylic acid |
| N02AA01 | Opioid | Morphine |
| N02AA03 | Opioid | Hydromorphone |
| N02AA04 | Opioid | Nicomorphine |
| N02AA05 | opioid | Oxycodone |
| N02AA55 | Opioid | Oxycodone and naloxone |
| N03AB01 | Opioid | Ketobemidone |
| N02AB02 | Opioid | Pepthidine |
| N02AB03 | Opioid | Fentanyl |
| N02AC04 | Opioid | Dextropropoxyphene |
| N02AD01 | Opioid | Pentazocine |
| NO2AE01 | Opioid | Buprenorphine |
| N02AG02 | Opioid | Ketobemidone, antispasmodics |
| N02AJ06 | Opioid | Codeine, paracetamol |
| N02AJ07 | Opioid | Codeine, acetylsalicylic acid |
| N02BA75 | Opioid | Codeine, caffeine, propyphenazone, salicylamide, magnesium oxide |
| R05DA04 | Opioid | Codeine |
| NO2AX02 | Opioid | Tramadol |
| N02AX06 | Opioid | Tapentadol |

NSAID: Non-steroidal anti-inflammatory drugs

**Table S2
Characteristics of study participants lost to follow-up**

| **Characteristic** | **Included sample**, N = 2,803 | **Lost to follow-up**, N = 1,177 |
| --- | --- | --- |
| **Sex** |  |  |
| Male | 904 /2,803 (32%) | 390 /1,177 (33%) |
| Female | 1,899 /2,803 (68%) | 787 /1,177 (67%) |
| **Age** |  |  |
| Mean (SD) | 58 (12) | 55 (14) |
| Median (IQR) | 60 (51, 67) | 56 (46, 66) |
| Range | 20, 90 | 19, 88 |
| **Duration of LBP episode** |  |  |
| Less than a year | 1,138 /2,777 (41%) | 472 /1,132 (42%) |
| More than a year | 1,639 /2,777 (59%) | 660 /1,132 (58%) |
| (Missing) | 26 | 45 |
| **Occupation status** |  |  |
| Working | 1,543 /2,803 (55%) | 691 /1,177 (59%) |
| Under education | 17 /2,803 (0.6%) | 14 /1,177 (1.2%) |
| Unemployment | 20 /2,803 (0.7%) | 10 /1,177 (0.8%) |
| Welfare payment | 267 /2,803 (9.5%) | 150 /1,177 (13%) |
| Retirement | 916 /2,803 (33%) | 296 /1,177 (25%) |
| Other | 40 /2,803 (1.4%) | 16 /1,177 (1.4%) |
| **Education level** |  |  |
| Primary School/high school | 434 /2,775 (16%) | 224 /1,169 (19%) |
| Skilled worker/short-term education | 1,208 /2,775 (44%) | 537 /1,169 (46%) |
| Long/medium term higher education | 1,133 /2,775 (41%) | 408 /1,169 (35%) |
| Missing | 28 | 8 |
| **Body Mass Index (BMI)** (kg/m3) |  |  |
| Mean (SD) | 27.6 (5.3) | 27.9 (5.5) |
| Median (IQR) | 26.6 (23.8, 30.4) | 26.9 (24.2, 30.7) |
| Range | 15.4, 62.5 | 16.7, 58.0 |
| (Missing) | 24 | 26 |
| **BMI category** |  |  |
| Underweight (BMI below 18.5) | 23 /2,743 (0.8%) | 10 /1,130 (0.9%) |
| Normal weight (BMI 18.5 to less than 25), | 944 /2,743 (34%) | 357 /1,130 (32%) |
| Overweight (BMI 25 to less than 30) | 1,015 /2,743 (37%) | 435 /1,130 (38%) |
| Obese (BMI above 30) | 761 /2,743 (28%) | 328 /1,130 (29%) |
| (Missing) | 60 | 47 |
| **Other chronic conditions** |  |  |
| None | 2,000 /2,803 (71%) | 838 /1,177 (71%) |
| One or more | 803 /2,803 (29%) | 339 /1,177 (29%) |
| **Backpain baseline** |  |  |
| Mean (SD) | 5.36 (2.29) | 5.60 (2.31) |
| Median (IQR) | 6.00 (4.00, 7.00) | 6.00 (4.00, 7.00) |
| Range | 0.00, 10.00 | 0.00, 10.00 |
| (Missing) | 15 | 38 |
| **ODI score baseline** |  |  |
| Mean (SD) | 24 (12) | 26 (13) |
| Median (IQR) | 22 (16, 32) | 26 (18, 34) |
| Range | 0, 74 | 0, 72 |
| (Missing) | 41 | 154 |
| **Illness perceptions baseline** |  |  |
| Mean (SD) | 42 (11) | 44 (12) |
| Median (IQR) | 43 (35, 50) | 45 (36, 51) |
| Range | 3, 79 | 1, 76 |
| (Missing) | 54 | 108 |
| **Self-efficacy baseline** |  |  |
| Mean (SD) | 6.81 (1.86) | 6.53 (1.94) |
| Median (IQR) | 7.00 (5.50, 8.20) | 6.76 (5.20, 8.00) |
| Range | 1.00, 10.00 | 1.00, 10.00 |
| (Missing) | 79 | 184 |
| **EQ-5D Baseline** |  |  |
| Mean (SD) | 63 (19) | 59 (19) |
| Median (IQR) | 67 (50, 79) | 60 (49, 75) |
| Range | 0, 100 | 9, 100 |
| (Missing) | 166 | 237 |
| **Visits before** |  |  |
| Mean (SD) | 12 (16) | 10 (13) |
| Median (IQR) | 8 (2, 16) | 6 (1, 13) |
| Range | 0, 166 | 0, 108 |
| **Visits after** |  |  |
| Mean (SD) | 9 (17) | 7 (13) |
| Median (IQR) | 2 (0, 10) | 0 (0, 8) |
| Range | 0, 137 | 0, 118 |
| **Visits change** |  |  |
| Mean (SD) | -3 (14) | -4 (13) |
| Median (IQR) | -3 (-9, 1) | -3 (-8, 0) |
| Range | -81, 102 | -99, 76 |
| **Any visits in year before enrollment** |  |  |
| None | 435 /2,803 (16%) | 205 /1,177 (17%) |
| One or more | 2,368 /2,803 (84%) | 972 /1,177 (83%) |
| **Any visits in year after end of intervention** |  |  |
| None | 1,236 /2,803 (44%) | 607 /1,177 (52%) |
| One or more | 1,567 /2,803 (56%) | 570 /1,177 (48%) |
| **DDD redeemed in year before enrollment** |  |  |
| Mean (SD) | 113 (172) | 119 (186) |
| Median (IQR) | 51 (0, 151) | 51 (0, 154) |
| Range | 0, 1,727 | 0, 1,426 |
| **DDD redeemed in year after end of intervention** |  |  |
| Mean (SD) | 93 (167) | 106 (188) |
| Median (IQR) | 0 (0, 112) | 6 (0, 131) |
| Range | 0, 1,561 | 0, 1,237 |
| **DDD change** |  |  |
| Mean (SD) | -20 (113) | -14 (113) |
| Median (IQR) | 0 (-50, 0) | 0 (-44, 0) |
| Range | -918, 785 | -726, 703 |
| **Any DDD redeemed in year before enrollment** |  |  |
| None | 922 /2,803 (33%) | 371 /1,177 (32%) |
| One or more | 1,881 /2,803 (67%) | 806 /1,177 (68%) |
| **Any DDD redeemed in year after end of intervention** |  |  |
| None | 1,434 /2,803 (51%) | 562 /1,177 (48%) |
| One or more | 1,369 /2,803 (49%) | 615 /1,177 (52%) |
| **Hospital care for LBP in year before enrollment** | 410 /2,803 (15%) | 181 /1,177 (15%) |
| **Hospital care for LBP in year after end of intervention** | 258 /2,803 (9.2%) | 124 /1,177 (11%) |
| **MRI of lumbar spine in year before enrollment** | 641 /2,803 (23%) | 270 /1,177 (23%) |
| **MRI of lumbar spine in year after end of intervention** | 219 /2,803 (7.8%) | 121 /1,177 (10%) |

**Table S3
Associations between changes in PROMS and visits of analgesic use at follow-up for all models and all subgroups**

|  |  | Visits to primary care |  | Analgesics use |  |
| --- | --- | --- | --- | --- | --- |
| Sample | **Model** | **IRR (95%CI)** | **P.value** | **IRR (95%CI)** | **P.value** |
| Backpain |  |  |  |  |  |
| Total sample | Model 1 | 0.93 (0.86;1) | 0.053 | 0.99 (0.93;1.07) | 0.874 |
|  | Model 2 | 0.92 (0.87;0.96) | <0.001 | 0.95 (0.9;0.99) | 0.025 |
|  | Model 3 | 0.92 (0.88;0.97) | 0.001 | 0.96 (0.92;1.01) | 0.12 |
| High users | Model 1 | 1.07 (0.92;1.25) | 0.399 | 0.96 (0.89;1.04) | 0.3 |
|  | Model 2 | 0.96 (0.88;1.06) | 0.441 | 0.93 (0.88;0.98) | 0.012 |
|  | Model 3 | 0.96 (0.87;1.06) | 0.433 | 0.94 (0.89;0.99) | 0.02 |
| Medium users | Model 1 | 0.83 (0.71;0.96) | 0.015 | 0.87 (0.82;0.93) | <0.001 |
|  | Model 2 | 0.83 (0.75;0.91) | <0.001 | 0.86 (0.81;0.91) | <0.001 |
|  | Model 3 | 0.83 (0.75;0.91) | <0.001 | 0.87 (0.82;0.93) | <0.001 |
| Low users | Model 1 | 0.85 (0.72;1.01) | 0.064 | 0.88 (0.8;0.97) | 0.012 |
|  | Model 2 | 0.94 (0.84;1.04) | 0.242 | 0.86 (0.79;0.93) | <0.001 |
|  | Model 3 | 0.95 (0.85;1.05) | 0.312 | 0.86 (0.79;0.94) | <0.001 |
| ODI |  |  |  |  |  |
| Total sample | Model 1 | 0.95 (0.88;1.03) | 0.185 | 1.06 (0.99;1.13) | 0.085 |
|  | Model 2 | 0.94 (0.9;0.99) | 0.014 | 1 (0.95;1.05) | 0.984 |
|  | Model 3 | 0.94 (0.9;0.99) | 0.015 | 1.01 (0.96;1.06) | 0.673 |
| High users | Model 1 | 0.9 (0.78;1.04) | 0.158 | 1 (0.94;1.07) | 0.945 |
|  | Model 2 | 0.96 (0.88;1.06) | 0.433 | 0.97 (0.92;1.02) | 0.173 |
|  | Model 3 | 0.96 (0.88;1.05) | 0.364 | 0.97 (0.92;1.02) | 0.232 |
| Medium users | Model 1 | 0.91 (0.77;1.07) | 0.268 | 0.88 (0.82;0.94) | <0.001 |
|  | Model 2 | 0.85 (0.77;0.94) | 0.002 | 0.86 (0.81;0.91) | <0.001 |
|  | Model 3 | 0.85 (0.77;0.94) | 0.002 | 0.87 (0.82;0.93) | <0.001 |
| Low users | Model 1 | 0.94 (0.78;1.14) | 0.527 | 0.88 (0.8;0.98) | 0.018 |
|  | Model 2 | 0.98 (0.87;1.1) | 0.684 | 0.85 (0.77;0.92) | <0.001 |
|  | Model 3 | 0.98 (0.87;1.11) | 0.766 | 0.85 (0.77;0.92) | <0.001 |
| Self-efficacy |  |  |  |  |  |
| Total sample | Model 1 | 0.98 (0.91;1.06) | 0.645 | 1 (0.93;1.08) | 0.968 |
|  | Model 2 | 0.91 (0.87;0.96) | <0.001 | 0.94 (0.9;0.98) | 0.01 |
|  | Model 3 | 0.92 (0.87;0.96) | <0.001 | 0.96 (0.91;1) | 0.062 |
| High users | Model 1 | 0.96 (0.81;1.14) | 0.636 | 1 (0.93;1.08) | 0.967 |
|  | Model 2 | 0.97 (0.87;1.08) | 0.559 | 0.94 (0.89;0.99) | 0.02 |
|  | Model 3 | 0.96 (0.86;1.07) | 0.456 | 0.95 (0.9;1) | 0.05 |
| Medium users | Model 1 | 0.98 (0.85;1.13) | 0.788 | 0.87 (0.81;0.93) | <0.001 |
|  | Model 2 | 0.84 (0.76;0.92) | <0.001 | 0.87 (0.82;0.93) | <0.001 |
|  | Model 3 | 0.84 (0.77;0.93) | <0.001 | 0.89 (0.84;0.94) | <0.001 |
| Low users | Model 1 | 0.99 (0.84;1.17) | 0.925 | 0.9 (0.82;0.99) | 0.034 |
|  | Model 2 | 0.87 (0.79;0.97) | 0.011 | 0.89 (0.82;0.97) | 0.008 |
|  | Model 3 | 0.87 (0.78;0.97) | 0.011 | 0.91 (0.83;0.98) | 0.019 |
| Illness perceptions |  |  |  |  |  |
| Total sample | Model 1 | 0.97 (0.9;1.05) | 0.417 | 1.04 (0.98;1.11) | 0.226 |
|  | Model 2 | 0.96 (0.92;1.01) | 0.153 | 0.98 (0.94;1.03) | 0.377 |
|  | Model 3 | 0.97 (0.92;1.01) | 0.161 | 0.98 (0.94;1.03) | 0.477 |
| High users | Model 1 | 0.96 (0.82;1.13) | 0.616 | 1.01 (0.94;1.08) | 0.877 |
|  | Model 2 | 0.95 (0.86;1.04) | 0.268 | 0.97 (0.92;1.02) | 0.275 |
|  | Model 3 | 0.94 (0.86;1.04) | 0.249 | 0.97 (0.92;1.02) | 0.209 |
| Medium users | Model 1 | 0.98 (0.83;1.15) | 0.769 | 0.9 (0.85;0.96) | 0.002 |
|  | Model 2 | 0.89 (0.8;0.99) | 0.031 | 0.88 (0.83;0.94) | <0.001 |
|  | Model 3 | 0.89 (0.81;0.99) | 0.033 | 0.89 (0.83;0.94) | <0.001 |
| Low users | Model 1 | 0.94 (0.8;1.11) | 0.498 | 0.92 (0.84;1.02) | 0.103 |
|  | Model 2 | 1.02 (0.92;1.14) | 0.704 | 0.91 (0.83;0.99) | 0.026 |
|  | Model 3 | 1.02 (0.91;1.14) | 0.732 | 0.91 (0.84;1) | 0.042 |
| EQ-5D |  |  |  |  |  |
| Total sample | Model 1 | 0.95 (0.88;1.03) | 0.198 | 1.02 (0.96;1.09) | 0.52 |
|  | Model 2 | 0.96 (0.92;1.01) | 0.143 | 0.97 (0.93;1.02) | 0.236 |
|  | Model 3 | 0.97 (0.92;1.01) | 0.168 | 0.98 (0.93;1.03) | 0.358 |
| High users | Model 1 | 0.93 (0.81;1.07) | 0.343 | 1 (0.94;1.07) | 0.928 |
|  | Model 2 | 0.99 (0.9;1.09) | 0.839 | 0.97 (0.92;1.02) | 0.223 |
|  | Model 3 | 0.99 (0.9;1.08) | 0.778 | 0.97 (0.92;1.03) | 0.32 |
| Medium users | Model 1 | 1.03 (0.89;1.19) | 0.714 | 0.88 (0.83;0.94) | <0.001 |
|  | Model 2 | 0.96 (0.87;1.06) | 0.467 | 0.87 (0.82;0.93) | <0.001 |
|  | Model 3 | 0.97 (0.88;1.07) | 0.524 | 0.88 (0.83;0.93) | <0.001 |
| Low users | Model 1 | 0.98 (0.82;1.18) | 0.825 | 0.87 (0.78;0.96) | 0.006 |
|  | Model 2 | 1.02 (0.9;1.14) | 0.796 | 0.88 (0.81;0.97) | 0.008 |
|  | Model 3 | 1.02 (0.91;1.14) | 0.788 | 0.89 (0.81;0.97) | 0.012 |

Incidence rate ratios (IRRs) are the exponentiated coefficients of the interaction between a PROM and time in the count part of the zero-inflated negative binomial regression analysis.
Model 1= crude model, Model 2 = adjusted for sex, age, duration of pain episode, education level, year of enrollment, use of visits or analgesics before enrollment, Model 3 = as model 2 but additionally adjusted for each PROM score.
Models with visits as outcome included random intercepts for ID and clinic.
Low visit use, n= 1.028 visits range 0 to 4. Medium visit use, n = 869 visits range 5 to 12. High visit use, n = 906 visits range 13 to 166. Low analgesics use, n=634 DDD range 1 to 59. Medium analgesics use, n=626, DDD range 61 to 165. High analgesics use, n=621 DDD range 165 to 1,727.
DDD: defined daily dose.

**Table S4
Characteristics of subgroups based on visits before enrollment**

|  |  | **Use of visits to physiotherapists or chiropractors before enrollment** | | |
| --- | --- | --- | --- | --- |
| **Characteristic** | **Overall**, N = 2,803 | **Low use (0-4)**, N = 1,028 | **Medium use (5-12)**, N = 869 | **High use (12-166)**, N = 906 |
| **Female Sex** | 1,899/2,803 (68%) | 651/1,028 (63%) | 587/869 (68%) | 661/906 (73%) |
| **Age, mean (SD)** | 58 (12) | 59 (12) | 57 (12) | 59 (12) |
| **LBP episode lasting longer than one year** | 1,639/2,777 (59%) | 625/1,022 (61%) | 465/860 (54%) | 549/895 (61%) |
| (Missing) | 26 | 6 | 9 | 11 |
| **Occupation status** |  |  |  |  |
| Working | 1,543/2,803 (55%) | 576/1,028 (56%) | 526/869 (61%) | 441/906 (49%) |
| Under education | 17/2,803 (0.6%) | <1% | 8/869 (0.9%) | <1% |
| Retirement | 916/2,803 (33%) | 352/1,028 (34%) | 240/869 (28%) | 324/906 (36%) |
| Welfare payment | 267/2,803 (9.5%) | 75/1,028 (7.3%) | 73/869 (8.4%) | 119/906 (13%) |
| Unemployment | 20/2,803 (0.7%) | <1% | 8/869 (0.9%) | <1% |
| Other | 40/2,803 (1.4%) | 12/1,028 (1.2%) | 14/869 (1.6%) | 14/906 (1.5%) |
| **Education level** |  |  |  |  |
| Primary School/high school | 434/2,775 (16%) | 160/1,021 (16%) | 134/855 (16%) | 140/899 (16%) |
| Skilled worker/short-term education | 1,208/2,775 (44%) | 437/1,021 (43%) | 382/855 (45%) | 389/899 (43%) |
| Long/medium term higher education | 1,133/2,775 (41%) | 424/1,021 (42%) | 339/855 (40%) | 370/899 (41%) |
| Missing | 28 | 7 | 14 | 7 |
| **Body mass index, (kg/m3) median (25th, 75th percentile)** | 26.6 (23.8, 30.4) | 26.5 (23.7, 29.8) | 26.7 (24.0, 30.5) | 26.8 (23.7, 30.9) |
| (Missing) | 24 | 11 | 6 | 7 |
| **One or more other chronic conditions before enrollment** | 733/2,803 (26%) | 263/1,028 (26%) | 207/869 (24%) | 263/906 (29%) |
| **Backpain baseline, mean (SD)** | 5.36 (2.29) | 5.44 (2.32) | 5.24 (2.32) | 5.37 (2.23) |
| (Missing) | 15 | 5 | 5 | 5 |
| **Backpain 3 months, mean (SD)** | 3.82 (2.41) | 3.71 (2.41) | 3.71 (2.43) | 4.06 (2.38) |
| (Missing) | 22 | 9 | 5 | 8 |
| **Backpain mean change (SD)** | -1.53 (2.48) | -1.73 (2.52) | -1.54 (2.53) | -1.29 (2.36) |
| 95% CI | -1.62, -1.43 | -1.88, -1.57 | -1.71, -1.37 | -1.44, -1.13 |
| **Oswestry Disability index baseline, mean (SD)** | 24 (12) | 23 (12) | 23 (12) | 26 (12) |
| (Missing) | 41 | 16 | 10 | 15 |
| **Oswestry Disability index 3 months, mean (SD)** | 19 (13) | 18 (13) | 18 (13) | 21 (13) |
| (Missing) | 126 | 49 | 41 | 36 |
| **Oswestry Disability index, mean change (SD)** | -5.08 (9.67) | -4.79 (9.44) | -5.4 (9.76) | -5.11 (9.83) |
| 95%CI | -5.45, -4.71 | -5.39, -4.19 | -6.07, -4.73 | -5.77, -4.45 |
| **Illness perceptions baseline, mean (SD)** | 42 (11) | 42 (11) | 42 (11) | 43 (11) |
| (Missing) | 54 | 25 | 11 | 18 |
| **Illness perceptions 3 months, mean (SD)** | 35 (14) | 34 (14) | 34 (14) | 36 (13) |
| (Missing) | 111 | 42 | 29 | 40 |
| **Illness perceptions, mean change (SD)** | -8.07 (14.22) | -7.76 (14.05) | -8.49 (14.44) | -8 (14.21) |
| 95% CI | -8.59, -7.54 | -8.62, -6.9 | -9.46, -7.53 | -8.93, -7.08 |
| **Self-efficacy baseline, mean (SD)** | 6.81 (1.86) | 6.78 (1.94) | 7.09 (1.78) | 6.59 (1.82) |
| (Missing) | 79 | 31 | 17 | 31 |
| **Self-efficacy 3 months, mean (SD)** | 6.88 (2.04) | 6.85 (2.05) | 7.06 (2.11) | 6.72 (1.93) |
| (Missing) | 203 | 83 | 58 | 62 |
| **Self-efficacy mean change (SD)** | 0.04 (1.88) | 0.05 (1.91) | -0.04 (1.83) | 0.12 (1.88) |
| 95% CI | -0.03, 0.12 | -0.08, 0.17 | -0.17, 0.09 | 0.00, 0.25 |
| **EQ-5D Baseline, mean (SD)** | 63 (19) | 64 (19) | 64 (18) | 61 (19) |
| (Missing) | 166 | 60 | 53 | 53 |
| **EQ-5D 3 months, mean (SD)** | 69 (18) | 70 (18) | 70 (18) | 66 (18) |
| (Missing) | 271 | 106 | 84 | 81 |
| **EQ-5D mean change (SD)** | 5.43 (17.32) | 4.9 (17.04) | 6.23 (16.83) | 5.27 (18.07) |
| 95% CI | 4.74, 6.13 | 3.77, 6.03 | 5.02, 7.44 | 4, 6.54 |
| **Visits before** |  |  |  |  |
| Mean (SD) | 12 (16) | 1 (2) | 8 (2) | 28 (20) |
| Median (IQR) | 8 (2, 16) | 1 (0, 3) | 8 (6, 10) | 21 (16, 32) |
| **Visits after** |  |  |  |  |
| Mean (SD) | 9 (17) | 4 (10) | 6 (10) | 18 (24) |
| Median (IQR) | 2 (0, 10) | 0 (0, 4) | 1 (0, 8) | 9 (0, 26) |
| **Visits change** |  |  |  |  |
| Mean (SD) | -3 (14) | 3 (10) | -3 (10) | -10 (17) |
| Median (IQR) | -3 (-9, 1) | 0 (-1, 3) | -5 (-8, -1) | -13 (-18, -3) |
| **Any visits before** | 2,368/2,803 (84%) | 593/1,028 (58%) | 869/869 (100%) | 906/906 (100%) |
| **Any visits in year after** | 1,567/2,803 (56%) | 419/1,028 (41%) | 480/869 (55%) | 668/906 (74%) |
| **Redeemed DDD before** |  |  |  |  |
| Mean (SD) | 113 (172) | 96 (158) | 99 (166) | 144 (187) |
| Median (IQR) | 51 (0, 151) | 34 (0, 121) | 43 (0, 126) | 76 (1, 202) |
| **Redeemed DDD after** |  |  |  |  |
| Mean (SD) | 93 (167) | 81 (157) | 79 (156) | 119 (185) |
| Median (IQR) | 0 (0, 112) | 0 (0, 90) | 0 (0, 101) | 45 (0, 172) |
| **DDD change** |  |  |  |  |
| Mean (SD) | -20 (113) | -15 (104) | -20 (102) | -25 (132) |
| Median (IQR) | 0 (-50, 0) | 0 (-39, 0) | 0 (-50, 0) | 0 (-62, 0) |
| **Any DDD redeemed before** | 1,881/2,803 (67%) | 639/1,028 (62%) | 562/869 (65%) | 680/906 (75%) |
| **Any DDD redeemed after** | 1,369/2,803 (49%) | 454/1,028 (44%) | 397/869 (46%) | 518/906 (57%) |
| **Hospital care before** | 410/2,803 (15%) | 129/1,028 (13%) | 132/869 (15%) | 149/906 (16%) |
| **Hospital care after** | 258/2,803 (9.2%) | 88/1,028 (8.6%) | 65/869 (7.5%) | 105/906 (12%) |
| **MRI of lumbar spine before** | 641/2,803 (23%) | 194/1,028 (19%) | 201/869 (23%) | 246/906 (27%) |
| **MRI of lumbar spine after** | 219/2,803 (7.8%) | 82/1,028 (8.0%) | 52/869 (6.0%) | 85/906 (9.4%) |
|  | | | | |

Visits include visits to physiotherapists and chiropractors.

DDD is the defined daily dose for paracetamol, NSAIDs, or opioids.

Before refers to the year before enrollment and after refers to the year after the end of intervention**Table S5
Characteristics of subgroups based on analgesic use before enrollment**

|  |  | **Redeemed defined daily doses (DDD) before enrollment** | | | |
| --- | --- | --- | --- | --- | --- |
| **Characteristic** | **Overall**, N = 2,803 | **No use**, N = 922 | **Low use (1-59)**, N = 634 | **Medium use (61-165)**, N = 626 | **High use (165-1,727)**, N = 621 |
| **Female sex** | 1,899 /2,803 (68%) | 582 /922 (63%) | 430 /634 (68%) | 440 /626 (70%) | 447 /621 (72%) |
| **Age, mean (SD)** | 58 (12) | 57 (12) | 58 (12) | 58 (13) | 61 (11) |
| **LBP episode lasting longer than one year** | 1,639 /2,777 (59%) | 543 /917 (59%) | 344 /624 (55%) | 359 /620 (58%) | 393 /616 (64%) |
| (Missing) | 26 | 5 | 10 | 6 | 5 |
| **Occupation status** |  |  |  |  |  |
| Working | 1,543 /2,803 (55%) | 580 /922 (63%) | 359 /634 (57%) | 322 /626 (51%) | 282 /621 (45%) |
| Under education | 17 /2,803 (0.6%) | 6 /922 (0.7%) | 7 /634 (1.1%) | <1% | <1% |
| Retirement | 916 /2,803 (33%) | 263 /922 (29%) | 199 /634 (31%) | 218 /626 (35%) | 236 /621 (38%) |
| Welfare payment | 267 /2,803 (9.5%) | 50 /922 (5.4%) | 52 /634 (8.2%) | 74 /626 (12%) | 91 /621 (15%) |
| Unemployment | 20 /2,803 (0.7%) | 7 /922 (0.8%) | 5 /634 (0.8%) | <1% | <1% |
| Other | 40 /2,803 (1.4%) | 16 /922 (1.7%) | 12 /634 (1.9%) | <1% | <1% |
| **Highest completed education** |  |  |  |  |  |
| Primary School/high school | 434 /2,775 (16%) | 105 /911 (12%) | 109 /630 (17%) | 96 /619 (16%) | 124 /615 (20%) |
| Skilled worker/short-term education | 1,208 /2,775 (44%) | 374 /911 (41%) | 271 /630 (43%) | 269 /619 (43%) | 294 /615 (48%) |
| Long/medium term higher education | 1,133 /2,775 (41%) | 432 /911 (47%) | 250 /630 (40%) | 254 /619 (41%) | 197 /615 (32%) |
| Missing | 28 | 11 | 4 | 7 | 6 |
| **Body mass index (kg/m3)** | 26.6 (23.8, 30.4) | 25.8 (23.2, 29.0) | 26.7 (23.7, 30.4) | 26.9 (24.1, 30.7) | 28.1 (24.7, 32.0) |
| (Missing) | 24 | 8 | <1% | 9 | <1% |
| **One or more other chronic conditions before enrollment** | 733 /2,803 (26%) | 189 /922 (20%) | 154 /634 (24%) | 179 /626 (29%) | 211 /621 (34%) |
| **Back pain intensity baseline** |  |  |  |  |  |
| Mean (SD) | 5.36 (2.29) | 4.78 (2.18) | 5.21 (2.36) | 5.60 (2.35) | 6.11 (2.06) |
| (Missing) | 15 | 3 | 4 | 5 | 3 |
| **Back pain intensity 3 months** |  |  |  |  |  |
| Mean (SD) | 3.82 (2.41) | 3.31 (2.28) | 3.48 (2.31) | 4.04 (2.41) | 4.71 (2.44) |
| (Missing) | 22 | 7 | 3 | 8 | 4 |
| **Back pain intensity, mean change (SD)** | -1.53 (2.48) | -1.46 (2.45) | -1.72 (2.61) | -1.55 (2.49) | -1.40 (2.36) |
| 95% CI | -1.62, -1.43 | -1.61, -1.3 | -1.93, -1.52 | -1.75, -1.36 | -1.58, -1.21 |
| **Oswestry Disability Index baseline** |  |  |  |  |  |
| Mean (SD) | 24 (12) | 19 (10) | 23 (12) | 26 (12) | 31 (13) |
| (Missing) | 41 | 14 | 8 | 13 | 6 |
| **Oswestry Disability Index score 3 months** |  |  |  |  |  |
| Mean (SD) | 19 (13) | 14 (10) | 17 (12) | 21 (13) | 26 (13) |
| (Missing) | 126 | 39 | 23 | 33 | 31 |
| **Oswestry Disability Index mean change (SD)** | -5.08 (9.67) | -4.58 (8.51) | -5.75 (9.99) | -5.65 (10.36) | -4.58 (10.16) |
| 95% CI | -5.45, -4.71 | -5.15, -4.02 | -6.55, -4.95 | -6.49, -4.81 | -5.4, -3.75 |
| **Illness perceptions baseline** |  |  |  |  |  |
| Mean (SD) | 42 (11) | 39 (11) | 41 (12) | 44 (10) | 46 (11) |
| (Missing) | 54 | 16 | 13 | 14 | 11 |
| **Illness perceptions 3 months** |  |  |  |  |  |
| Mean (SD) | 35 (14) | 31 (14) | 33 (13) | 37 (13) | 40 (13) |
| (Missing) | 111 | 34 | 18 | 27 | 32 |
| **Illness perceptions, mean change (SD)** | -8.07 (14.22) | -8.25 (13.71) | -8.55 (14.34) | -8.09 (14.71) | -7.28 (14.36) |
| 95% CI | -8.59, -7.54 | -9.13, -7.36 | -9.66, -7.43 | -9.25, -6.94 | -8.41, -6.15 |
| **Self-efficacy baseline** |  |  |  |  |  |
| Mean (SD) | 6.81 (1.86) | 7.29 (1.70) | 6.94 (1.88) | 6.68 (1.86) | 6.12 (1.85) |
| (Missing) | 79 | 24 | 19 | 25 | 11 |
| **Self-efficacy 3 months** |  |  |  |  |  |
| Mean (SD) | 6.88 (2.04) | 7.39 (1.89) | 7.11 (1.98) | 6.72 (2.03) | 6.02 (2.01) |
| (Missing) | 203 | 56 | 45 | 51 | 51 |
| **Self-efficacy, mean change (SD)** | 0.04 (1.88) | 0.11 (1.77) | 0.15 (1.92) | 0.01 (1.89) | -0.13 (1.96) |
| 95% CI | -0.03, 0.12 | 0.00, 0.23 | -0.01, 0.31 | -0.15, 0.16 | -0.29, 0.03 |
| **EQ-5D Baseline** |  |  |  |  |  |
| Mean (SD) | 63 (19) | 69 (17) | 65 (18) | 59 (19) | 56 (19) |
| (Missing) | 166 | 44 | 39 | 47 | 36 |
| **EQ-5D 3 months** |  |  |  |  |  |
| Mean (SD) | 69 (18) | 74 (16) | 71 (17) | 66 (19) | 61 (20) |
| (Missing) | 271 | 68 | 53 | 83 | 67 |
| **EQ-5D mean change (SD)** | 5.43 (17.32) | 4.47 (15.63) | 6.23 (17.16) | 6.41 (17.92) | 5.14 (19.26) |
| 95% CI | 4.74, 6.13 | 3.4, 5.54 | 4.8. 7.66 | 4.85, 7.97 | 3.49, 6.79 |
| **Visits before** |  |  |  |  |  |
| Mean (SD) | 12 (16) | 10 (13) | 11 (14) | 13 (18) | 16 (19) |
| Median (IQR) | 8 (2, 16) | 6 (2, 12) | 7 (2, 14) | 8 (3, 16) | 10 (3, 20) |
| **Visits after** |  |  |  |  |  |
| Mean (SD) | 9 (17) | 7 (15) | 8 (16) | 9 (17) | 13 (20) |
| Median (IQR) | 2 (0, 10) | 1 (0, 7) | 1 (0, 9) | 2 (0, 11) | 4 (0, 17) |
| **Visits change** |  |  |  |  |  |
| Mean (SD) | -3 (14) | -3 (13) | -3 (13) | -4 (14) | -3 (15) |
| Median (IQR) | -3 (-9, 1) | -2 (-8, 0) | -3 (-8, 0) | -3 (-10, 0) | -3 (-10, 2) |
| **Any visits before** | 2,368 /2,803 (84%) | 754 /922 (82%) | 533 /634 (84%) | 538 /626 (86%) | 543 /621 (87%) |
| **Any visits after** | 1,567 /2,803 (56%) | 475 /922 (52%) | 348 /634 (55%) | 355 /626 (57%) | 389 /621 (63%) |
| **Redeemed DDD before** |  |  |  |  |  |
| Mean (SD) | 113 (172) | 0 (0) | 32 (17) | 106 (30) | 368 (204) |
| Median (IQR) | 51 (0, 151) | 0 (0, 0) | 34 (18, 51) | 101 (81, 134) | 301 (224, 459) |
| **Redeemed DDD after** |  |  |  |  |  |
| Mean (SD) | 93 (167) | 0 (0) | 41 (71) | 91 (102) | 285 (241) |
| Median (IQR) | 0 (0, 112) | 0 (0, 0) | 5 (0, 53) | 68 (1, 129) | 234 (101, 410) |
| **DDD change** |  |  |  |  |  |
| Mean (SD) | -20 (113) | 0 (0) | 9 (71) | -15 (100) | -83 (194) |
| Median (IQR) | 0 (-50, 0) | 0 (0, 0) | -10 (-33, 24) | -37 (-79, 17) | -83 (-189, 17) |
| **Any redeemed DDD before** | 1,881 /2,803 (67%) | 0 /922 (0%) | 634 /634 (100%) | 626 /626 (100%) | 621 /621 (100%) |
| **Any DDD redeemed after** | 1,369 /2,803 (49%) | 0 /922 (0%) | 335 /634 (53%) | 474 /626 (76%) | 560 /621 (90%) |
| **Hospital care before** | 410 /2,803 (15%) | 42 /922 (4.6%) | 67 /634 (11%) | 115 /626 (18%) | 186 /621 (30%) |
| **Hospital care after** | 258 /2,803 (9.2%) | 50 /922 (5.4%) | 51 /634 (8.0%) | 66 /626 (11%) | 91 /621 (15%) |
| **MRI of lumbar spine before** | 641 /2,803 (23%) | 103 /922 (11%) | 129 /634 (20%) | 184 /626 (29%) | 225 /621 (36%) |
| **MRI of lumbar spine after** | 219 /2,803 (7.8%) | 44 /922 (4.8%) | 41 /634 (6.5%) | 71 /626 (11%) | 63 /621 (10%) |
| Visits include visits to physiotherapists and chiropractors.  DDD is the defined daily dose for paracetamol, NSAIDs, or opioids.  Before refers to the year before enrollment and after refers to the year after the end of intervention | | | | | |

**
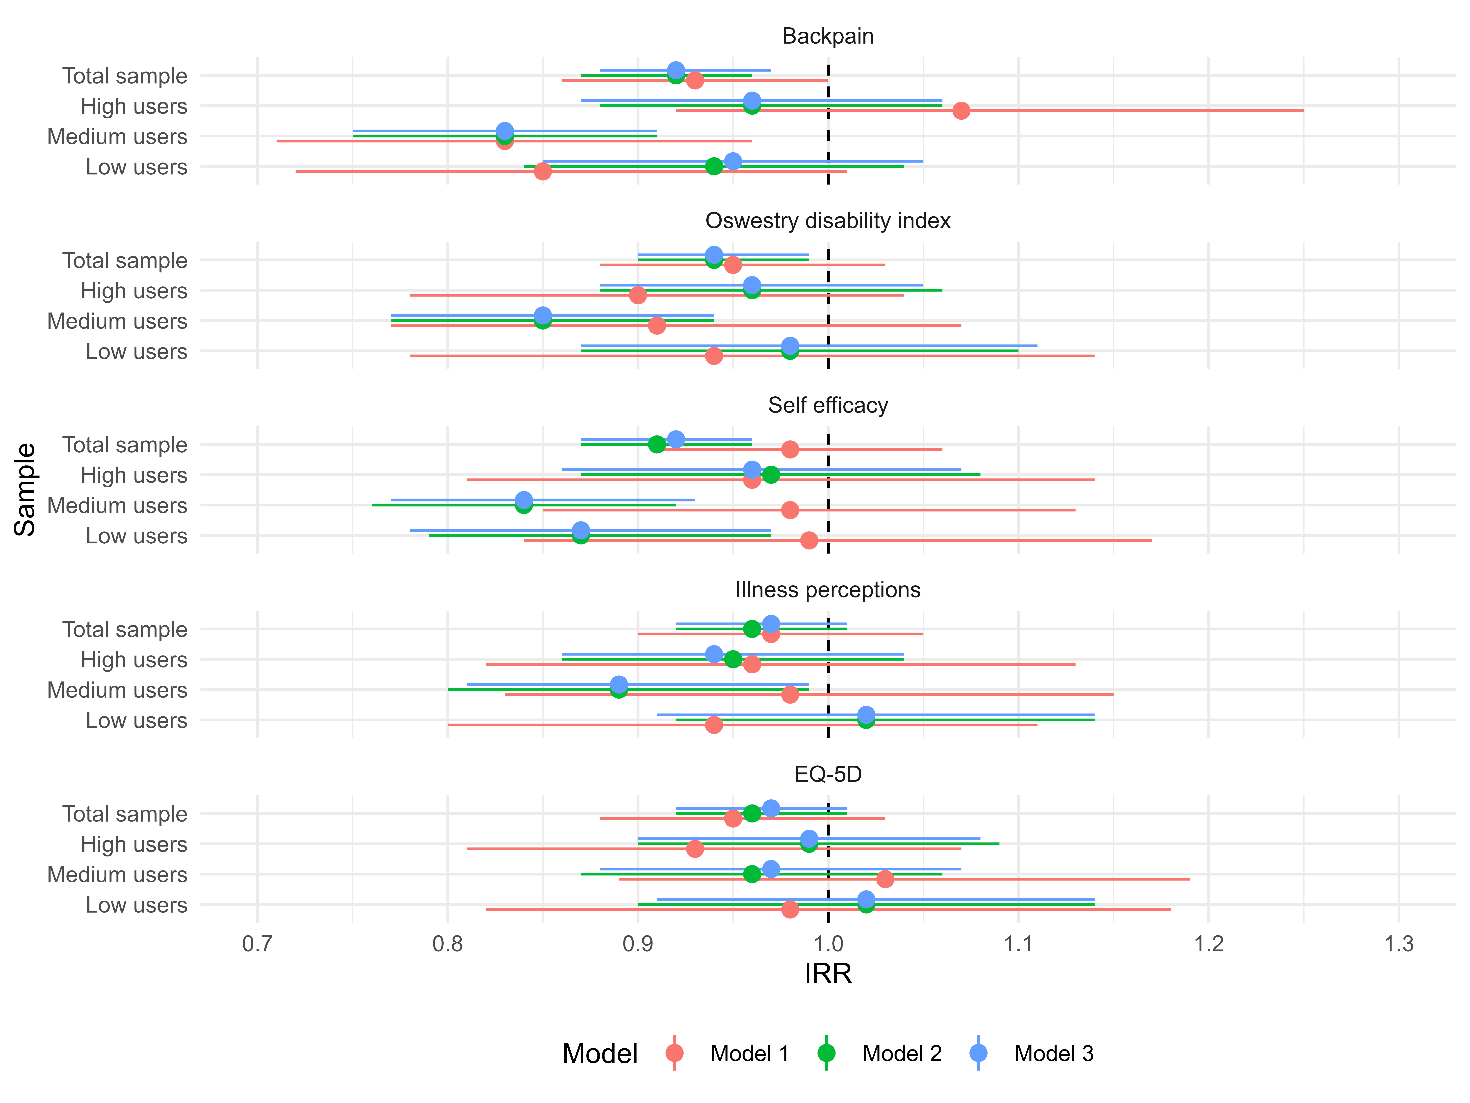
**

## **Figure S1 Associations between changes in PROMS and visits across models and samples**

Incidence rate ratios (IRRs) are the exponentiated coefficients of the interaction between a PROM and time in the count part of the zero-inflated negative binomial regression analysis.
**Model 1**= crude model,
**Model 2** = adjustedfor sex, age, duration of pain episode, level of education, year of enrollment, use of visits or analgesics before enrollment,
**Model 3** = as model 2 but additionally adjusted for each PROM score.
Models with visits as outcome included random intercepts for ID and clinic.
**Low visit use**, n= 1,028, visits range 0 to 4.
**Medium visit use**, n = 869, visits range 5 to 12.
**High visit use**, n = 906, visits range 13 to 166.


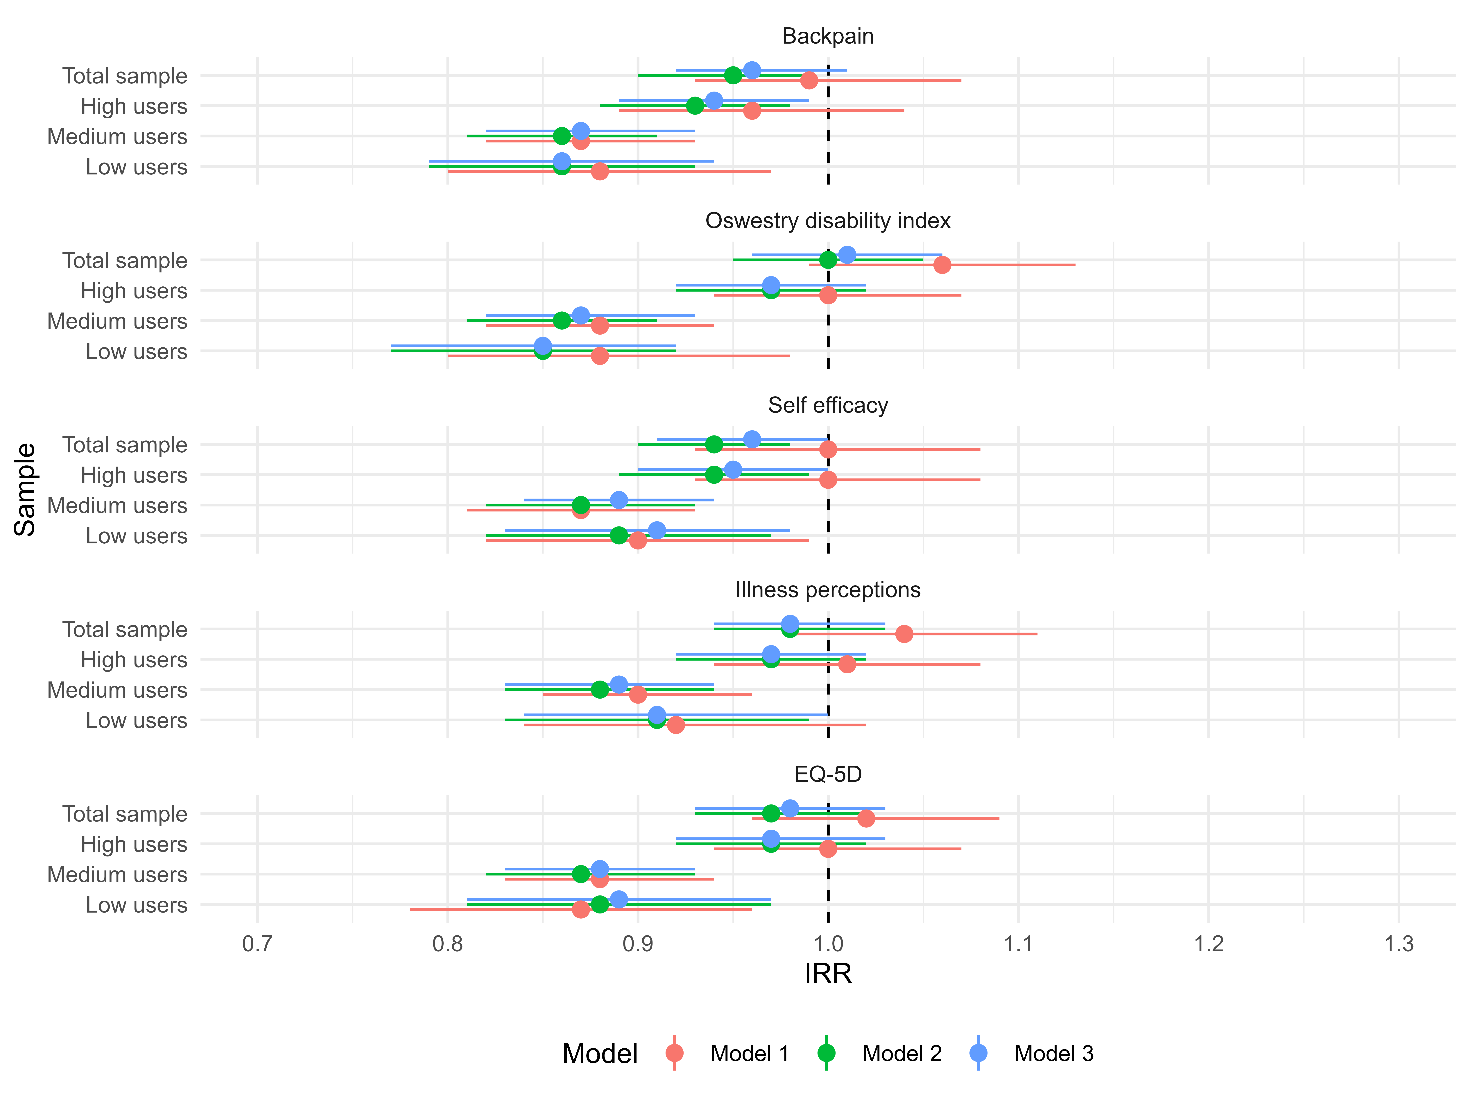


**Figure S2 Associations between changes in PROMS and analgesics use across models and samples**

Incidence rate ratios (IRRs) are the exponentiated coefficients of the interaction between a PROM and time in the count part of the zero-inflated negative binomial regression analysis.
**Model 1**= crude model,
**Model 2** = adjustedfor sex, age, duration of pain episode, level of education, year of enrollment, use of visits or analgesics before enrollment,
**Model 3** = as model 2 but additionally adjusted for each PROM score.
Models with visits as outcome included random intercepts for ID and clinic.
**Low analgesics use**, n=634, DDD range 1 to 59.
**Medium analgesics use**, n=626, DDD range 61 to 165.
**High analgesics use**, n=621, DDD range 165 to 1**,**727.
DDD: defined daily dose
